1  
2  
3  
4  
5  
6  
7  
8  
9  
10  
11  
12  
13  
14  
15  
16  
17  
18  
19  
20  
21  
22

**Emergent strategies for climate protection among German hospitals — A survey of  
hospital administrative leaders**

Lara Schmidt <sup>1\*</sup>, Sabine Bohnet-Joschko<sup>1</sup>

<sup>1</sup> Department of Management and Entrepreneurship, Witten/Herdecke University, Witten, Germany.

\*Corresponding author

E-mail: [lara.schmidt@uni-wh.de](mailto:lara.schmidt@uni-wh.de) (LS)

NOTE: This preprint reports new research that has not been certified by peer review and should not be used to guide clinical practice.

## 1 **Abstract**

2 Hospitals emit large amounts of greenhouse gas emissions during healthcare delivery due to their  
3 extensive resource utilization and substantial waste generation. By implementing climate actions,  
4 hospitals can significantly contribute to climate protection in healthcare. This paper delves into the  
5 climate protection efforts of German hospitals, with a specific focus on the emergent strategies of  
6 hospital administrative leaders and the employee engagement within the framework of Stakeholder  
7 Theory. The investigation is based on primary data from an online survey of hospital administrative  
8 leaders in German hospitals. Employing a hierarchical cluster analysis, the study identifies four distinct  
9 clusters of hospitals. These clusters vary significantly in their organization and communication strategies  
10 regarding climate protection and allocation of responsibilities, indicating that German hospitals  
11 prioritize climate protection to varying degrees. The findings suggest that employee engagement  
12 depends on how hospital administrative leaders organize and communicate the topic of climate  
13 protection in their institutions. The study underscores the importance of strategic leadership for climate  
14 protection in hospitals.

## 15 **Introduction**

16 Climate change represents one of the greatest challenges to humankind and significantly impacts both  
17 physical and mental health [1]. Examples include heat-related illnesses and deaths due to dehydration, heat  
18 stroke, and cardiovascular diseases [2]. Climate-related impacts are projected to increase in intensity  
19 throughout this century, threatening to disrupt the ability of healthcare systems to provide quality care [3].  
20 Furthermore, healthcare delivery has also been shown to contribute to climate change [4]. The modern  
21 healthcare sector accounts for approximately 4 – 5 % of global greenhouse gas (GHG) emissions [3, 5].  
22 Specifically, hospitals emit large amounts of GHG emissions through their medical care and associated  
23 administrative activities [6], utilizing numerous resources and producing various wastes [7]. By taking  
24 action to reduce GHG emissions, hospitals can make a significant and ongoing contribution to climate  
25 protection [8]. Fundamental climate actions such as strategies for energy efficiency, waste recycling, and  
26 low-carbon procurement can be mentioned as steps towards improving the climate, as numerous examples  
27 show [9-11].

28 Implementing climate actions will continue to be necessary as climate protection becomes increasingly  
29 important in public health and health policy debates [12]. The increased focus is also driven by global  
30 declarations such as the Paris Agreement, as the first universal and legally binding global climate agreement  
31 enacted in 2016 [13], or the European Green Deal enacted in 2021 [14]. In addition to political agreements,  
32 non-profit organizations are supporting the transformation of the healthcare sector towards greater  
33 sustainability. Internationally, the non-profit organization Health Care Without Harm initiated the Global  
34 Green and Healthy Hospitals (GGHH) network in 2011. This network, recognized by the World Health  
35 Organization, provides a comprehensive framework consisting of ten interconnected objectives for  
36 hospitals to promote greater sustainability and environmental health, including:

- 37 1. Leadership as a superordinate goal, essential at all levels to promote green and healthy hospitals,
- 38 2. Substitution of harmful chemicals with safer alternatives,
- 39 3. Reduction, treatment, and safe disposal of medical and non-medical waste,
- 40 4. Promotion of energy efficiency and clean, renewable energy generation,
- 41 5. Reduction of water consumption and provision of potable water,

- 42 6. Improvement of transport strategies for patients and employees,
- 43 7. Reduction of food waste and promotion of healthy, locally and sustainably produced food,
- 44 8. Reduction of pharmaceutical pollution and prescription of safer pharmaceuticals,
- 45 9. Green buildings to develop greener and healthier hospital design and construction,
- 46 10. Purchase of sustainable products and materials [15, 16].

47 With a view to these objectives, current research often addresses energy [17, 18], waste [19, 20], and  
48 transportation [21, 22], while areas such as chemicals, water, food, pharmaceuticals, buildings, and  
49 purchasing are less investigated in comparison. No study has yet focused on hospitals' administrative  
50 leadership and their strategies for climate protection [23]. However, hospitals' administrative leadership  
51 will be in a pole position to plan and implement climate actions and create a fundamental change toward  
52 an environmentally sustainable corporate culture through communication and employee engagement [24].

53 As a global network with more than 1.900 members, GGHH is represented in more than 86 countries [5].  
54 The network includes healthcare organizations from countries such as the United Kingdom, with 38  
55 members, and Australia, with 156 members [25], which are already pursuing national strategies with  
56 ambitious targets for climate protection in the healthcare sector [11, 22, 26], while German healthcare  
57 organizations are less present with a total of 18 members.

58 The German healthcare system is often regarded as one of the best in the world, providing universal health  
59 insurance coverage and access to a comprehensive range of services with comparatively low cost-sharing  
60 requirements. Inpatient care is of great importance, with a dense network of hospitals comprising a mix of  
61 public, private not-for-profit, and private for-profit institutions [27]. It includes more than 1.800 hospitals  
62 with different bed capacities and levels of care [28], caring for around 17 million cases per year [29]. With  
63 European regulations such as the Sustainability Reporting Directive (CSRD) coming into force [30], the  
64 vast majority of German hospitals are obliged to include sustainability as an integral part of their corporate  
65 strategy in the future [31].

66 In this context, our study explores the formation of German hospitals' strategic perspectives on climate  
67 protection, focusing on hospital administrative leadership and communication. The research question is:  
68 "How are German hospitals strategically positioned to contribute to climate protection?"

## 69 **Theoretical perspective**

70 Companies across various sectors increasingly strive to consider environmental and social aspects within  
71 their business activities [32, 33]. In this way, they are responding to the social and political pressure exerted  
72 by various stakeholders [34], which has particularly increased with the introduction of CSRD in 2023 [30].  
73 Central to this discourse, the Stakeholder Theory [35] is a framework often used to explain a firm's  
74 sustainability-related behavior [36]. Since its inception [35], Stakeholder Theory has developed into a large  
75 and diverse branch of research that comprehensively addresses almost all management sub-disciplines [37].

76 Stakeholder Theory advocates a management approach that emphasizes the need to consider the interests  
77 and needs of all stakeholders, including shareholders, employees, customers, and suppliers [38, 39], who  
78 can affect or be affected by the organization's activities [35, 40]. It emphasizes the importance of  
79 continuous stakeholder engagement to align stakeholder needs with organizational goals [41, 42] and as a  
80 strategic variable to achieve long-term and sustainable business success by strengthening stakeholder  
81 cooperation and trust [35, 37, 43].

82 In the context of hospital administrative leadership's implementation of climate protection strategies,  
83 employees play a crucial and active role in achieving sustainability outcomes. Employees are at the  
84 forefront of the organization, contributing innovative ideas, providing solutions to problems, and  
85 implementing climate actions [44]. Their involvement in shaping initiatives contributes to broader  
86 ecological sustainability performance, enhancing the acceptance of changes within the corporate culture  
87 [45]. Therefore, access to information, support, and communication through the administrative leadership  
88 is essential for employees to propose initiatives and participate in climate protection [46]. The participatory  
89 process of addressing their interests and engagement is essential for strategic alignment in climate  
90 protection [47].

91 In this context, hospital administrative leaders need to find ways to meet their employees' various interests  
92 and needs [35, 43] and simultaneously align these interests through organization and communication [37].  
93 In their pioneering role, administrative leaders can motivate employees to contribute to climate protection  
94 [48, 49].

95 To understand which strategies German hospitals adopt to contribute to climate protection, we examine the  
96 administrative leadership regarding their organization and communication and, in this context, the role of  
97 employees in implementing climate actions.

## 98 **Methodology**

99 A quantitative research methodology was employed to collect numerical data from hospital administrative  
100 leaders.

### 101 **Sample and data collection**

102 A cross-sectional survey design was utilized for this research. Surveys were conducted across public,  
103 private non-profit, and private for-profit hospitals in Germany. Day-care hospitals and psychosomatic  
104 clinics were excluded. The study's sample comprised hospital administrative leaders from 1.169 hospitals.  
105 Data was collected between December 12, 2022, and March 19, 2023. Administrative leaders were  
106 identified through the hospital's website and quality reports. Survey invitations and a brief introduction of  
107 the study were disseminated via email and LinkedIn. In instances where contact information was  
108 unavailable, the hospital's email address for general inquiries was used, with a request to forward the survey  
109 to the hospital administrative leader. After six weeks, a reminder was sent to encourage participation in the  
110 survey.

### 111 **Ethics statement**

112 Participation in the online survey was voluntary and did not represent any risk, discomfort or intervention  
113 to hospital administrative leaders. The study design and its purpose were explained, contact information  
114 were provided to ask any questions related to study. Participants were fully informed about their rights  
115 and withdrawal mechanism and gave written consent. Only non-sensitive and professional information  
116 was collected. The collected data were kept anonymous and cannot be traced back.

## 117 Questionnaire design

118 The survey's design was meticulously crafted, drawing upon an extensive literature review that delved into  
119 hospitals' contributions to climate protection [23, 50]. Before the start of the survey, participants were  
120 informed about its duration, data anonymity, and compliance with data protection regulations, which they  
121 acknowledged by checking a box. This served as written consent, ensuring that participants were aware of  
122 the purpose of the study, how the data would be handled, and their rights before proceeding. The  
123 questionnaire was presented in German and comprised six sections:

- 124 A. **Socio-demographic data of respondents:** This section captured age, gender, and working experience  
125 in hospital administrative leadership.
- 126 B. **Characteristics of hospitals:** This section gathered information on the hospital's size, ownership, and  
127 level of care.
- 128 C. **Climate action implementation:** Focused on collecting data regarding the extent to which and in  
129 which areas hospitals have already implemented climate actions and collected performance indicators.
- 130 D. **Climate protection initiatives and projects:** Included questions about the hospital's employees'  
131 engagement in adopting climate protection initiatives.
- 132 E. **Organization:** Explored the hospitals' organization concerning climate protection, including strategic  
133 planning, requirements for suppliers, and the allocation of human resources for coordination and  
134 management.
- 135 F. **Communication:** Investigated the communication practices of hospital administrative leadership  
136 regarding climate protection, including communication about carbon footprint performance indicators,  
137 opportunities to contribute ideas for implementing climate actions, and regular meetings for climate  
138 protection.

139 Questions in sections two to five were formatted to allow binary responses (yes/no) and ratings on a Likert  
140 scale, ranging from 1 (strongly disagree) to 7 (strongly agree). A Likert scale is predicated on the  
141 assumption that personal assessments can be quantitatively measured [51] and was used to analyze the  
142 distribution of responses and to group the hospitals.

143 Pretests were performed with five hospital administrative leaders to evaluate the questionnaire's  
144 practicability, completeness, and comprehensibility. These tests were also instrumental in identifying and  
145 rectifying any potential errors within the online survey. As a result, some questions were restructured and  
146 rephrased. The questionnaire was designed using an online survey tool (LimeSurvey version 6.4.1).

## 147 Data analysis

148 Upon completion of the survey, the data set of 288 individual responses was meticulously screened to  
149 ensure the validity of the responses, identify missing values, and recognize outliers [52]. Eighty-three  
150 responses were removed as they were not sufficiently completed for our analysis. The data set was  
151 transferred to IBM SPSS Statistics version 22, cleaned, and further analyzed. To provide a comprehensive  
152 overview, the demographic characteristics of the respondents and the hospitals characteristics were  
153 described using descriptive statistics.

## 154 Cluster analysis

155 We conducted a cluster analysis with inferential tests. The goal was to identify a grouping wherein the  
156 characteristics within each cluster are similar yet distinct across clusters [53]. We applied a hierarchical  
157 algorithm based on Ward's method, which is known to be appropriate for small data sets [54], to distinguish  
158 homogeneous clusters reflective of hospital climate protection strategies in organization and  
159 communication. To identify and, if necessary, exclude outliers, the single-linkage method (nearest  
160 neighbor) was employed [55]. The number of clusters was identified using the elbow method, which  
161 provides visual support for the cluster decision [56, 57]. Based on this analysis, a four-cluster solution was  
162 chosen. Subsequently, we empirically examined the four clusters to compare the differences in means  
163 regarding their strategies for climate actions. The Bonferroni post-hoc test confirmed that all variables  
164 significantly contribute to the differentiation of the four clusters.

## 165 Inferential statistics

166 Consistent with other studies [58, 59], we utilized a multiway MANOVA to ascertain significant differences  
167 among the contributions to climate protection across the four clusters. MANOVA is a well-established



168 statistical method used to explore the relationships between several categorical independent variables and  
169 two or more metric dependent variables [53].

170 We conducted a chi-square test to assess differences in hospital characteristics. This non-parametric  
171 method, chosen for its ability to compare proportions between two or more groups and to test the null  
172 hypothesis of independence [60], has practical implications for understanding the distribution of climate  
173 actions across the clusters. The MANOVA was also utilized to evaluate the outcomes related to climate  
174 actions.

## 175 **Results**

### 176 **Sample characteristics**

177 Our final sample included 205 respondents, with a majority being male (81.5 %). The median age was  
178 between 50 and 59 years. Seventy-four respondents (36 %) reported holding an administrative leadership  
179 position in multiple hospitals, boosting our study's implications beyond 205 hospitals within Germany. The  
180 respondents' median work experience was 10 – 14 years (see Table 1).

181 **Table 1. Socio-demographic characteristics of the respondents (n=205).**

| <b>Characteristics</b> | <b>Sample (%)</b> |
|------------------------|-------------------|
| <b>Age</b>             |                   |
| Under 30               | 7.32 %            |
| 30 – 39                | 19.02 %           |
| 40 – 49                | 23.41 %           |
| 50 – 59                | 35.12 %           |
| Over 60                | 15.12 %           |
| <b>Gender</b>          |                   |
| Male                   | 81.46 %           |
| Female                 | 18.05 %           |
| Diverse                | 0.49 %            |

| <b>Administrative leadership position in multiple hospitals</b> |         |
|-----------------------------------------------------------------|---------|
| Yes                                                             | 36.10 % |
| No                                                              | 63.90 % |
| <b>Work experience as a hospital administrative leader</b>      |         |
| Less than 5 years                                               | 20.00 % |
| 5 – 9 years                                                     | 17.56 % |
| 10 – 14 years                                                   | 18.05 % |
| 15 – 20 years                                                   | 18.05 % |
| More than 20 years                                              | 26.34 % |

182

183 As outlined in Table 2, hospital characteristics reveal a median range of 300 – 499 beds per hospital.

184 Approximately 39.02 % of the surveyed hospitals provide primary and standard care. Hospital ownership

185 was evenly distributed. Hospital administrative leaders from single hospitals (40 %) primarily participated

186 in the survey.

187 **Table 2. Hospital characteristics (n=205).**

| <b>Characteristics</b>    | <b>Sample (%)</b> |
|---------------------------|-------------------|
| <b>Hospital beds</b>      |                   |
| Less than 50              | 2.44 %            |
| 50 – 149                  | 17.56 %           |
| 150 – 299                 | 20.00 %           |
| 300 – 499                 | 25.85 %           |
| 500 – 799                 | 19.02 %           |
| More than 800             | 15.12 %           |
| <b>Level of care</b>      |                   |
| Specialist care           | 18.05 %           |
| Primary and standard care | 39.02 %           |

|                           |         |
|---------------------------|---------|
| Intermediate care         | 27.32 % |
| Maximum care              | 8.78 %  |
| University clinic         | 6.83 %  |
| <b>Hospital ownership</b> |         |
| Public                    | 38.54 % |
| Private non-profit        | 33.17 % |
| Private for-profit        | 28.29 % |
| <b>Hospital structure</b> |         |
| Single hospital           | 40.00 % |
| Hospital alliance         | 24.88 % |
| Hospital group            | 35.12 % |

188

189 The majority of hospitals represented in our study have implemented climate actions in the areas of energy  
190 and buildings. Actions were often implemented in hospital engineering, while medical departments were  
191 rarely affected. Most hospitals have not set up a sustainability committee or a cost center. The driving force  
192 behind the implementation of actions are technical employees, followed by the administrative employees,  
193 while the medical employees seem to show little engagement.

## 194 Clustering emergent climate protection strategies in German hospitals

195 Cluster analysis identified four distinct groups of emergent strategies for climate protection in German  
196 hospitals. The clusters, each with its unique characteristics, are described in Table 3. According to the  
197 Bonferonni post-hoc test, all selected cluster variables significantly contribute to cluster separation. The  
198 results of the MANOVA indicate statistically significant differences among the mean values (mv) for each  
199 cluster, as evidenced by p-values for the F-statistic test being less than 0.05. Significant differences include  
200 hospital characteristics, the implementation of climate actions, and climate protection initiatives and  
201 projects.

203 **Table 3. Results of MANOVA.**

| Characteristics (mv)                                                                                                                | Centroids           |                     |                     |                     | MANOVA  |       |
|-------------------------------------------------------------------------------------------------------------------------------------|---------------------|---------------------|---------------------|---------------------|---------|-------|
|                                                                                                                                     | Cluster 1<br>(n=66) | Cluster 2<br>(n=54) | Cluster 3<br>(n=27) | Cluster 4<br>(n=58) | F       | Sig.  |
| Strategic planning                                                                                                                  | 2.31                | 3.1                 | 4.65                | 6.1                 | 65.733  | <.001 |
| Established sustainability requirements for suppliers, according to the Act on Corporate Due Diligence Obligations in Supply Chains | 1.94                | 3.89                | 4.2                 | 5.39                | 44.387  | <.001 |
| Allocating human resources                                                                                                          | 1.39                | 1.89                | 5.37                | 4.98                | 122.375 | <.001 |
| Hospital administrative leadership’s pioneering role                                                                                | 2.98                | 5.23                | 4.95                | 6.65                | 73.748  | <.001 |
| Regular communication about carbon footprint performance indicators                                                                 | 1.37                | 2.34                | 2.01                | 4.96                | 64.256  | <.001 |
| Opportunity to contribute ideas for implementing climate actions                                                                    | 4.67                | 5.51                | 6.46                | 6.55                | 17.296  | <.001 |
| Regular meetings for climate protection                                                                                             | 1.37                | 2.77                | 3.54                | 5.4                 | 60.387  | <.001 |

204

205 A radar chart for the clusters enabled in-depth profiling of emergent strategies for climate protection (see

206 Fig. 1). We labeled the first cluster “Aspiring Novices”, as it comprises hospitals with little leadership focus

207 on climate protection, all the same allowing their employees to contribute ideas for climate actions. The

208 second cluster comprises hospitals discovering climate protection and is labeled “Participative Explorers”.

209 A notable feature of this cluster is the dual focus on employees’ ideas and administrative leadership’s

210 pioneering role. We labeled the third cluster “Invested Practitioners”. This cluster not only encourages

211 employee contributions and administrative leadership’s pioneering role but also stands out for allocating  
212 additional human resources to facilitate the execution of climate-related actions. The best climate protection  
213 strategy characterizes Cluster 4, labeled as “Well-equipped Experts”. It shares the previous clusters’  
214 emphasis on employees’ involvement and administrative leadership’s pioneering role but further  
215 distinguishes itself through comprehensive strategic planning for climate protection.

## 216 **Fig. 1. Centroids.**

217 Our research has revealed significant differences in several aspects of climate action implementation. These  
218 aspects include the implementation of climate actions, the hospital areas and departments where these  
219 actions were implemented, the allocation of responsibilities, the establishment of sustainability committees,  
220 and the responsibility among the employees (detailed information in S1 Tables).

### 221 **Cluster 1: Aspiring Novices**

222 Comprising 32.20 % of the sample, hospitals in Cluster 1 possess between 50 and 799 beds and are in public  
223 ownership. In particular, they are single hospitals that provide primary and standard care, while no  
224 university hospital is represented. This group displays a minor engagement with climate protection,  
225 exhibiting minimal strategic planning and implementation of climate actions (mean value (mv) = 3.74),  
226 primarily implemented in the area of energy (mv = 4.30). Implementing climate actions occurs in hospital  
227 engineering (mv = 4.07), while medical departments are marginally affected. Hospital administrative  
228 leaders reported unclear responsibilities regarding climate protection (mv = 2.85). 1.52 % of the hospitals  
229 in Cluster 1 have established a sustainability committee, and no hospital in this cluster possesses a cost  
230 center for implementing climate actions. Administrative leaders also reported collecting key performance  
231 indicators for climate protection in energy consumption (mv = 4.36) and water consumption (mv = 4.24).  
232 About 56 % of hospitals have taken initiatives and projects for climate protection. While technical  
233 employees initiated initiatives and projects (mv = 5.22), hospital administrative leaders estimated limited  
234 climate protection efforts by medical employees. In the future, the technical employees (mv = 5.94) and the  
235 hospital administrative leadership (mv = 5.87) should expand their responsibility for climate protection  
236 while no additional engagement is expected from medical employees.

237 **Cluster 2: Participative Explorers**

238 Hospitals in Cluster 2 (26.34 %) possess a medium number of beds and are mainly privately owned. In  
239 particular, they are part of a hospital group and provide primary and standard care. This group shows a  
240 moderate commitment to climate protection with moderate strategic planning efforts. Although the  
241 implementation of climate actions (mv = 4.63) is higher than in Cluster 1, it is in the lower range compared  
242 to the other clusters. The implementation of climate actions (mv = 4.63) focuses on energy (mv = 4.99) and  
243 food (mv = 4.79). Hospital administrative leaders reported implementing climate actions in hospital  
244 engineering (mv = 5.13) and food supply (mv = 4.61), while, similar to Cluster 1, the medical departments  
245 are slightly affected. Responsibilities for climate protection are significantly higher than in Cluster 1 but  
246 remain at a medium level in group comparison (mv = 4.11). In this cluster, 25.93 % of hospitals have  
247 established a sustainability committee, and 3.70 % possess a cost center for implementing climate actions.  
248 Key performance indicators for climate protection are collected in more areas than in Cluster 1, but least in  
249 the consumption quantity of transportation (mv = 3.58) as well as in consumption through procurement  
250 (mv = 3.74) and chemical disposal and anesthesia suction (mv = 3.78). About 87 % of the hospital  
251 administrative leaders in Cluster 2 reported taking initiatives and projects for climate protection. Technical  
252 (mv = 5.12) and, in some cases, administrative employees (mv = 4.66) lead initiatives for climate protection,  
253 while medical employees show little initiative. In the future, all professional groups within the hospitals  
254 should take more responsibility for climate protection. The primary responsibility will remain with the  
255 hospital administrative leadership (mv = 6.11).

256 **Cluster 3: Invested Practitioners**

257 Hospitals in Cluster 3 (13.17%) possess a medium number of beds and are primarily non-profit in their  
258 ownership. In particular, they are part of a hospital alliance and have the highest proportion of specialized  
259 care clinics in cluster comparison. They demonstrate a higher commitment to climate protection with a  
260 moderate strategic focus. Hospitals in Cluster 3 implement climate actions in almost all areas (mv = 5.68),  
261 with a particular focus on energy (mv = 5.87) and the area of pharmaceuticals only being moderately  
262 developed (mv = 4.06). In a cluster comparison, hospitals in Cluster 3 implement an above-average number  
263 of climate actions in chemicals (mv = 4.41). Unlike previous clusters, hospital administrative leaders

264 reported implementing more climate actions in medical departments, except for the intensive care unit (mv  
265 = 3.95). Clearly defined responsibilities for implementing climate actions characterize Cluster 3 (mv=5.66).  
266 In this cluster, 33.33 % of hospitals have established a sustainability committee, and 14.81 % possess a cost  
267 center for implementing climate actions. Key performance indicators for climate protection are collected in  
268 all areas except for the consumption of transportation (mv = 3.84) and consumption through procurement  
269 (mv = 3.79). In a cluster comparison, the most critical performance indicators for food disposal are collected  
270 in Cluster 3 (mv = 4.88). About 96.30 % of the hospital administrative leaders reported taking initiatives  
271 and projects for climate protection. Although technical employees (mv = 5.29) and administrative  
272 employees (mv = 4.83), in particular, are driving forward climate protection initiatives, medical employees  
273 also make a moderate contribution to climate protection (mv = 4.2). The contribution of the physicians was  
274 the highest in cluster comparison (mv = 3.92). In the future, all professional groups should assume more  
275 responsibility, with the hospital administrative leaders assigning the most responsibility to employees in  
276 functional service in cluster comparison (mv = 4.93).

#### 277 **Cluster 4: Well-equipped Experts**

278 Cluster 4 (28.29 %) comprises large hospitals with the highest proportion of university hospitals. These  
279 hospitals are single hospitals, part of a hospital group, and are in public ownership. They are most actively  
280 engaged in climate protection and possess a comprehensive strategic planning. They report extensive  
281 climate actions (mv = 6.37) across all areas except chemicals (mv = 3.3), focusing on energy (mv = 5.87),  
282 food (mv = 5.4), and buildings (mv = 5.35). Climate actions are actively implemented in all hospital areas  
283 and departments. Hospital administrative leaders reported clear responsibilities regarding the  
284 implementation of climate actions (mv = 6.43). About 56.90 % of hospitals established a sustainability  
285 committee, and 39.66 % reported a cost center for implementing climate actions. They also reported  
286 collecting key performance indicators for climate protection in all areas except food supply (mv = 3.83).  
287 All hospitals have taken initiatives and projects for climate protection. In cluster comparison, employees'  
288 contribution to initiatives and projects in Cluster 4 is at the highest level, except for medical employees (mv  
289 = 3.8). In the future, all professional groups should take more responsibility for the climate. The primary

290 responsibility should remain with the administrative leadership (mv = 6.2) and the technical employees (mv  
291 = 6.11).

292 The hospital structure data for each cluster is provided in Table 4.

293 **Table 4. Hospital structure of the four clusters.**

| Category                  | Cluster 1<br>(n=66) | Cluster 2<br>(n=54) | Cluster 3<br>(n=27) | Cluster 4<br>(n=58) |
|---------------------------|---------------------|---------------------|---------------------|---------------------|
| <b>Hospital beds</b>      |                     |                     |                     |                     |
| Less than 50              | 1.52 %              | 5.56 %              | 3.70 %              | 0.00 %              |
| 50 – 49                   | 25.76 %             | 16.67 %             | 14.81 %             | 10.34 %             |
| 150 – 299                 | 18.18 %             | 20.37 %             | 14.81 %             | 24.14 %             |
| 300 – 499                 | 21.21 %             | 29.63 %             | 33.33 %             | 24.14 %             |
| 500 – 799                 | 24.24 %             | 14.81 %             | 18.52 %             | 17.24 %             |
| More than 800             | 9.09 %              | 12.96 %             | 14.81 %             | 24.14 %             |
| <b>Level of care</b>      |                     |                     |                     |                     |
| Specialist care           | 22.73 %             | 18.52 %             | 25.93 %             | 8.62 %              |
| Primary and standard care | 39.39 %             | 44.44 %             | 29.63 %             | 37.93 %             |
| Intermediate care         | 25.76 %             | 27.78 %             | 25.93 %             | 29.31 %             |
| Maximum care              | 12.12 %             | 7.41 %              | 7.41 %              | 6.90 %              |
| University clinic         | 0.00 %              | 1.85 %              | 11.11 %             | 17.24 %             |
| <b>Hospital ownership</b> |                     |                     |                     |                     |
| Public                    | 45.45 %             | 29.63 %             | 29.63 %             | 43.10 %             |
| Private non-profit        | 30.30 %             | 24.07 %             | 51.85 %             | 36.21 %             |
| Private for-profit        | 24.24 %             | 46.30 %             | 18.52 %             | 20.69 %             |
| <b>Hospital structure</b> |                     |                     |                     |                     |
| Single hospital           | 56.06 %             | 27.78 %             | 25.93 %             | 39.66 %             |
| Hospital alliance         | 22.73 %             | 22.22 %             | 48.15 %             | 18.97 %             |
| Hospital group            | 21.21 %             | 50.00 %             | 25.93 %             | 41.38 %             |



## 294 **Discussion**

295 Environmental sustainability is an integral aspect of corporate strategies, and garners increased attention  
296 among companies. This trend, well documented in recent literature [61-63], aligns with objectives of  
297 enhancing operational efficiency, fostering competitive advantage, and contributing to climate protection  
298 efforts [64]. The healthcare sector, in particular, is advancing towards embracing ecological sustainability  
299 principles. Academic research on environmental sustainability in hospitals has primarily concentrated on  
300 energy efficiency and waste management practices [17]. Little is known about hospitals' administrative  
301 leadership strategies for climate protection [23]. This study aimed to scrutinize the strategic position of  
302 German hospitals towards climate protection and assess hospitals' contribution to climate protection from  
303 the administrative leadership's perspective. Our research focuses on the organization and communication  
304 characteristics of German hospitals and explores different stages in strategy development for climate  
305 protection while underscoring the engagement of hospital employees in climate protection initiatives.

306 We grouped hospitals into four distinct clusters and identified stages of strategic development toward  
307 climate protection. Hospitals were categorized into Cluster 1 through 4, while Cluster 1 indicates minimal  
308 engagement, whereas Cluster 4 signifies the most proactive attitude. Each cluster with unique  
309 characteristics highlights the relevance of administrative leadership's organization and communication in  
310 hospitals' climate protection efforts. The results indicate that a minority of hospitals (28.29 %) attained the  
311 highest level of commitment (Cluster 4), while a smaller fraction (13.17 %) was classified into Cluster 3.  
312 However, a significant majority (58.54 %) fell into the medium and low engagement categories (Cluster 2  
313 and 1), underscoring a need for more proactive administrative leadership in addressing climate protection.  
314 These findings confirm previous research indicating that German hospitals are yet to fully embrace active  
315 roles in climate protection [65, 66].

### 316 **Characteristics of hospitals**

317 While our analysis showed no differences based on hospital ownership, other structural characteristics  
318 proved statistically significant. Specifically, single hospitals demonstrated less commitment to climate  
319 protection efforts. In contrast, hospitals affiliated in groups exhibited a markedly higher commitment to

320 climate protection initiatives, including notable efforts to engage employees in these processes. A  
321 comparative analysis across four homogenous clusters further highlights this trend, revealing that larger  
322 hospitals within groups are better positioned to implement sustainability actions effectively than smaller  
323 and single hospitals. This advantage might be attributed to larger institutions' superior resources and  
324 organizational framework facilitating more comprehensive and impactful climate protection initiatives.  
325 Regulations, such as the CSRD, might be a driver in disclosing the social and environmental risks hospitals  
326 face [30]. The anticipated transparent description of GHG emissions will reveal the extent of hospitals'  
327 climate impact and the average contributions to climate protection [31].

### 328 **Climate action implementation**

329 Although most administrative leaders reported implementing climate actions, there are marked differences  
330 in scope. Operations and facility management emerge as common focal points across Clusters 2, 3, and 4  
331 highlighting energy as a central area of operations among respondents. This result is also reflected in the  
332 survey of key performance indicators for climate protection. While all hospitals collect data on energy  
333 consumption, data collection for chemical disposal, anesthesia suction, and food disposal seems to be of  
334 secondary importance. The marginal report of actions in hospital-specific domains such as chemicals or  
335 pharmaceuticals illustrates hospital administrative leaders' underestimation of specific GHG sources as  
336 reported by previous studies [67]. A significant part of hospital emissions are generated by hospital-specific  
337 emission sources. For example, medical supplies and medicines alone are responsible for up to 50 % of  
338 overall emissions [68]. Although the bulk of GHG emissions generated during patients' healthcare delivery  
339 is indispensable [69], the potential for climate actions in medical departments of German hospitals can be  
340 further exploited.

### 341 **Climate protection initiatives and projects**

342 We observed distinct variations in allocating responsibilities and human resources for climate action efforts  
343 across clusters. Clusters 1 and 2 do not allocate additional human resources for implementing climate  
344 actions, whereas Clusters 3 and 4 do. In hospitals without additional human resources, initiatives  
345 predominantly originate from technical employees (Cluster 1) and, to a lesser extent, administrative  
346 employees (Cluster 2). Hospital medical employees contribute to climate protection, where additional

347 human resources are created, and clear responsibilities exist (Cluster 3 and 4). Assigning overarching  
348 responsibility, for example, by creating a sustainability committee, can support the involvement of various  
349 employees within the hospital. Previous studies emphasize that employee engagement is crucial in  
350 developing and promoting environmental responsibility [70].

### 351 **Organization**

352 The clusters show considerable differences in the hospitals' organization regarding climate protection  
353 efforts. The implementation of climate actions across various hospital areas and departments critically  
354 hinges on the strategic planning undertaken by hospitals' administrative leadership, which is engaged for  
355 climate targets in a pioneering role (Cluster 1, 2, 3). Due to challenges such as the shortage of skilled  
356 employees and financial performance [71], climate protection is not a strategic priority in many hospitals,  
357 except those in Cluster 4. While the Act on Corporate Due Diligence Obligations in Supply Chains was  
358 introduced in Germany in 2023 [72], hospitals in Cluster 1 and 2 do not have established sustainability  
359 requirements for suppliers. The Act obliges organizations to ensure complete transparency along their  
360 supply chain and is intended to ascertain compliance with human rights and environmental obligations.  
361 Hospitals are obliged to fulfill their due diligence obligations and to transparently document these in an  
362 annual report [72]. Additionally, all respondents reported the pioneering role of hospital administrative  
363 leadership as pivotal (except in Cluster 1). Our approach exceeds previous research [70] by identifying  
364 emergent strategy stages.

### 365 **Communication**

366 Our findings indicate the relevance of employees' engagement through communication. Communication  
367 about climate protection is often associated with greater employee initiatives (Cluster 4), which is why this  
368 can be understood as a critical factor for the long-term success and legitimacy of further actions. Hospital  
369 stakeholders' awareness of GHG emissions and their sources is imperative for developing and  
370 implementing effective strategies for climate protection [67]. Thus, involving and addressing hospital  
371 employees' expectations regarding climate issues is paramount [65, 66]. In contrast to earlier research,  
372 suggesting a lack of employees' influence on climate actions [67], our study indicates that employees across  
373 all hospitals can contribute ideas for implementing climate protection initiatives.

374 In summary, the significant disparities among the clusters underscore that climate protection is still a new  
375 topic in the German hospital sector, with many institutions yet to prioritize it. Only hospitals in Cluster 4  
376 exemplify adherence to Stakeholder Theory principles [73, 74], demonstrating a commitment to strategic  
377 planning, employee involvement in decision-making processes, assignment of clear responsibilities, and  
378 transparent communication regarding climate protection efforts and emissions data. These findings  
379 emphasize the interconnectedness of hospital administrative leadership's influence and employees'  
380 engagement, advocating for continued administrative leadership support of climate protection initiatives  
381 [75]. It is crucial that hospital administrative leadership maintains its commitment to climate protection, as  
382 changing administrative leadership strategies can cultivate employee awareness, dedication, and actions  
383 toward climate protection [76].

384 To advance strategic objectives toward sustainability in German hospitals, it is crucial to investigate further  
385 the reasons behind the varying levels of climate actions across hospitals and to emphasize climate protection  
386 as a central leadership issue. Our study emphasizes the central role of hospital administrative leader's  
387 strategy and communication and the engagement of employees in climate protection efforts.

## 388 **Limitations**

389 This study is the first to analyze the contribution of German hospitals to climate protection from the  
390 perspective of their administrative leadership. While extensive in its multifaceted analysis, this study  
391 acknowledges certain limitations that open avenues for future research. Due to the current challenges facing  
392 German hospitals, such as skill shortages, climate protection is not a top issue for hospital administrative  
393 leaders, complicating recruitment efforts for this group. General challenges in recruiting administrative  
394 leaders for an online survey can also be observed in other studies among leaders [77, 78]. The usual  
395 limitations of an online survey apply [79, 80]. Although the questionnaire was sent exclusively to hospital  
396 administrative leaders, its anonymous nature means we cannot guarantee that it was completed solely by  
397 our target group. Additionally, comprehension problems on the part of the respondents cannot be  
398 recognized and rectified when using an online survey. However, this research approach was best suited to  
399 the aim of the study and the chosen target group. Although we have excluded day hospitals and psychiatric  
400 facilities, our results show emergent strategies that are applicable to all hospitals and relevant to all

401 healthcare organizations providing medical care. We could not incorporate other stakeholder' perspectives  
402 as we focused on assessing the hospital's administrative leadership. Exploring the perceptions of other  
403 hospital stakeholders could be a promising avenue for further research. The results may only partially reflect  
404 the diverse perspectives of the hospital administrative leaders, as interest and awareness of environmental  
405 issues beyond legal requirements vary. Those predisposed to climate protection might have been more  
406 likely to participate in this study than those less engaged with environmental issues. Additionally, we cannot  
407 dismiss the possibility of social desirability bias.

## 408 **Conclusion**

409 The urgency of climate change continues to require strategies from the healthcare sector. However, more  
410 research on corporate strategies and hospital administrative leadership practices is still needed. To our  
411 knowledge, this study represents the first comprehensive analysis of German hospitals' contribution to  
412 climate protection as reported by hospital administrative leaders. We identified four distinct clusters of  
413 hospitals associated with various structural characteristics and administrative leaders' strategies regarding  
414 climate protection. The results show that large hospitals contribute extensively to climate protection and  
415 possess a strategic planning. This can be attributed to the availability of personnel and financial resources,  
416 societal pressure to reduce GHG emissions, and the CSRD. Climate actions were mainly implemented in  
417 the area of energy. Key performance indicators on energy consumption are collected in all hospitals.  
418 Medical departments have, as yet, no significant role in climate protection. Technical and administrative  
419 employees are the driving force behind the implementation of climate actions. Clear climate protection  
420 strategies are not yet in place in most hospitals. As communication is often associated with greater initiative  
421 on the part of employees, it can be accentuated as a crucial indicator for the long-term success and  
422 legitimacy of further climate actions in German hospitals. The study highlights the significance of hospital  
423 administrative leadership and employee engagement for corporate sustainability and emphasizes the role  
424 of sustainable administrative leadership as essential for hospitals' contribution to planetary health.

## 425 **References**

- 426 1. World Health Organization. Climate Change 2023. Available from: [https://www.who.int/news-](https://www.who.int/news-room/fact-sheets/detail/climate-change-and-health)  
427 [room/fact-sheets/detail/climate-change-and-health](https://www.who.int/news-room/fact-sheets/detail/climate-change-and-health) (Accessed on 19 July 2024).
- 428 2. Haines A, Ebi K. The Imperative for Climate Action to Protect Health. *The New England Journal*  
429 *of Medicine*. 2019;380(3):263-73. doi: 10.1056/NEJMra1807873.
- 430 3. Watts N, Amann M, Arnell N, Ayeb-Karlsson S, Belesova K, Boykoff M, et al. The 2019 report  
431 of The Lancet Countdown on health and climate change: ensuring that the health of a child born  
432 today is not defined by a changing climate. *The Lancet*. 2019;394(10211):1836-78. doi:  
433 10.1016/S0140-6736(19)32596-6.
- 434 4. Eckelman MJ, Sherman J. Environmental Impacts of the U.S. Health Care System and Effects on  
435 Public Health. *PLoS One*. 2016;11(6):e0157014. doi: 10.1371/journal.pone.0157014.
- 436 5. Karliner J, Slotterback S. Health Care's Climate Footprint: How the Health Sector contributes to  
437 the global climate crisis and opportunities for action. *Health Care Without Harm*, 2019.
- 438 6. Bozoudis V, Sebos I. The Carbon Footprint of Transport Activities of the 401 Military General  
439 Hospital of Athens. *Environmental Modeling & Assessment*. 2020;26(2):155-62. doi:  
440 10.1007/s10666-020-09701-1.
- 441 7. Pencheon D. Health services and climate change: what can be done? . *Journal of health services,*  
442 *research & policy*. 2009;14:2-4. doi: 10.1258/jhsrp.2008.008147.
- 443 8. World Health Organization, Health Care Without Harm. Healthy hospitals, healthy planet, healthy  
444 people. *Addressing climate change in health care settings*; 2009.
- 445 9. Pinzone M, Lettieri E, Masella C. Proactive Environmental Strategies in Healthcare  
446 Organisations: Drivers and Barriers in Italy. *Journal of Business Ethics*. 2014;131(1):183-97. doi:  
447 10.1007/s10551-014-2275-8.
- 448 10. Steenmeijer MA, Rodrigues JD, Zijp MC, Waaijers-van der Loop SL. The environmental impact  
449 of the Dutch health-care sector beyond climate change: an input-output analysis. *Lancet Planet*  
450 *Health*. 2022;6(12):e949-e57. doi: 10.1016/S2542-5196(22)00244-3.

- 451 11. Tennison I, Roschnik S, Ashby B, Boyd R, Hamilton I, Oreszczyn T, et al. Health care's response  
452 to climate change: a carbon footprint assessment of the NHS in England. *Lancet Planet Health*.  
453 2021;5(2):e84-e92. doi: 10.1016/S2542-5196(20)30271-0.
- 454 12. Watts N, Amann M, Arnell N, Ayeb-Karlsson S, Belesova K, Berry H, et al. The 2018 report of  
455 the Lancet Countdown on health and climate change: shaping the health of nations for centuries to  
456 come. *The Lancet*. 2018;392(10163):2479-514. doi: 10.1016/S0140-6736(18)32594-7.
- 457 13. United Nations. Paris Agreement. 2015. Available from:  
458 [https://unfccc.int/sites/default/files/english\\_paris\\_agreement](https://unfccc.int/sites/default/files/english_paris_agreement) (Accessed on 23 June 2024).
- 459 14. European Commission. Delivering the European Green Deal 2023. Available from:  
460 [https://commission.europa.eu/strategy-and-policy/priorities-2019-2024/european-green-](https://commission.europa.eu/strategy-and-policy/priorities-2019-2024/european-green-deal/delivering-european-green-deal_en)  
461 [deal/delivering-european-green-deal\\_en](https://commission.europa.eu/strategy-and-policy/priorities-2019-2024/european-green-deal/delivering-european-green-deal_en) (Accessed on 16 June 2024).
- 462 15. Khairunnisa RA, Ulfa M, Azizi MR, Setyonugroho W. A future green and healthy hospital: A  
463 review article. *Proceedings of International Conference on Healthcare Facilities*. *Proceedings of*  
464 *International Conference on Healthcare Facilities*. 2021;1(1):82-94. doi:  
465 10.1016/j.envint.2016.02.029.
- 466 16. World Health Organization. Promoting Health: Guide to National Implementation of the Shanghai  
467 Declaration. Geneva, Switzerland: World Health Organization; 2017.
- 468 17. Keller RL, Muir K, Roth F, Jattke M, Stucki M. From bandages to buildings: Identifying the  
469 environmental hotspots of hospitals. *Journal of Cleaner Production*. 2021;319. doi:  
470 10.1016/j.jclepro.2021.128479.
- 471 18. Prada M, Prada IF, Cristea M, Popescu DE, Bungau C, Aleya L, et al. New solutions to reduce  
472 greenhouse gas emissions through energy efficiency of buildings of special importance -  
473 Hospitals. *Sci Total Environ*. 2020;718:137446. doi: 10.1016/j.scitotenv.2020.137446.
- 474 19. Grimmond TR, Bright A, Cadman J, Dixon J, Ludditt S, Robinson C, et al. Before/after  
475 intervention study to determine impact on life-cycle carbon footprint of converting from single-  
476 use to reusable sharps containers in 40 UK NHS trusts. *BMJ Open*. 2021;11(9):e046200. doi:  
477 10.1136/bmjopen-2020-046200.



- 478 20. Rizan C, Bhutta MF, Reed M, Lillywhite R. The carbon footprint of waste streams in a UK  
479 hospital. *Journal of Cleaner Production*. 2021;286. doi: 10.1016/j.jclepro.2020.125446.
- 480 21. John J, Collins M, O'Flynn K, Briggs T, Gray W, McGrath J. Carbon footprint of hospital laundry:  
481 a life-cycle assessment. *BMJ Open*. 2024;14(2):e080838. doi: 10.1136/bmjopen-2023-080838.
- 482 22. Whetten J, Montoya J, Yonas H. ACCESS to Better Health and Clear Skies: Telemedicine and  
483 Greenhouse Gas Reduction. *Telemedicine and E- Health*. 2019;25(10):960-5. doi:  
484 10.1089/tmj.2018.0172.
- 485 23. Schmidt L, Bohnet-Joschko S. Planetary Health and Hospitals' Contribution-A Scoping Review.  
486 *International Journal of Environmental Research and Public Health*. 2022;19(20). doi:  
487 10.3390/ijerph192013536.
- 488 24. Metcalf L, Benn S. Leadership for Sustainability: An Evolution of Leadership Ability. *Journal of*  
489 *Business Ethics*. 2012;112(3):369-84. doi: 10.1007/s10551-012-1278-6.
- 490 25. Health Care Without Harm. Global Green and Healthy Hospitals - Members around the world  
491 2024. Available from: <https://greenhospitals.org/about> (Accessed on 21 July 2024).
- 492 26. National Health Services. Delivering a 'Net Zero' National Health Service. London; 2020.
- 493 27. Blümel M, Spranger A, Achstetter K, Maresso A, Litvinova Y, Busse R. Germany. Health system  
494 summary; 2022.
- 495 28. Meissner W, Komann M, Erlenwein J, Stamer U, Scherag A. The Quality of Postoperative Pain  
496 Therapy in German Hospitals. *Dtsch Arztebl Int*. 2017;114(10):161-7. doi:  
497 10.3238/arztebl.2017.0161.
- 498 29. Federal Statistical Office of Germany. Hospitals 2023. Available from:  
499 [https://www.destatis.de/EN/Themes/Society-Environment/Health/Hospitals/\\_node.html#](https://www.destatis.de/EN/Themes/Society-Environment/Health/Hospitals/_node.html#)  
500 (Accessed on 24 June 2024).
- 501 30. European Commission. DIRECTIVE (EU) 2022/2464 OF THE EUROPEAN PARLIAMENT  
502 AND OF THE COUNCIL of 14 December 2022 amending Regulation (EU) No 537/2014,  
503 Directive 2004/109/EC, Directive 2006/43/EC and Directive 2013/34/EU, as regards corporate  
504 sustainability reporting; 2022.



- 505 31. Lehmann F, Schulz CM, Leicht D, Brady S, Fuhrmann A, Prutting J, et al. Persistent use of  
506 nitrous oxide for anaesthesia in European hospitals despite its harmfulness to the climate - how  
507 emission taxation can achieve the coupling of cost-effectiveness and climate protection:  
508 observational study. *BMC Health Serv Res.* 2023;23(1):1392. doi: 10.1186/s12913-023-10307-y.
- 509 32. Dahlsrud A. How corporate social responsibility is defined: an analysis of 37 definitions.  
510 *Corporate Social Responsibility and Environmental Management.* 2008;15(1):1-13. doi:  
511 10.1002/csr.132.
- 512 33. Schaltegger S, Burritt R. *Contemporary Environmental Accounting . Issues, Concepts and*  
513 *Practice.* London: Routledge; 2017.
- 514 34. Hahn R, Lülfs R. Legitimizing Negative Aspects in GRI-Oriented Sustainability Reporting: A  
515 Qualitative Analysis of Corporate Disclosure Strategies. *Journal of Business Ethics.*  
516 2013;123(3):401-20. doi: 10.1007/s10551-013-1801-4.
- 517 35. Freeman ER. *Strategic Management : A Stakeholder Approach.* Boston: Pitman Publishing Inc.;  
518 1984.
- 519 36. Snider J, Hill RP, Martin D. Corporate Social Responsibility in the 21st Century: A View from the  
520 World's Most Successful Firms. *Journal of Business Ethics.* 2003;48(2):175-87. doi:  
521 10.1023/B:BUSI.0000004606.29523.db.
- 522 37. Freeman ER, Harrison JS, Wicks AC, Parmar BL, de Colle S. *Stakeholder Theory: The State of*  
523 *the Art;* 2010.
- 524 38. Donaldson T, Preston LE. The Stakeholder Theory of the Corporation: Concepts, Evidence, and  
525 Implications. *Academy of Management.* 1995;20(1):65-91. doi: 10.2307/258887.
- 526 39. Driessen PH, Hillebrand B. Integrating Multiple Stakeholder Issues in New Product Development:  
527 An Exploration. *Journal of Product Innovation Management.* 2012;30(2):364-79. doi:  
528 10.1111/j.1540-5885.2012.01004.x.
- 529 40. Ozdemir S, Carlos Fernandez de Arroyabe J, Sena V, Gupta S. Stakeholder diversity and  
530 collaborative innovation: Integrating the resource-based view with stakeholder theory. *Journal of*  
531 *Business Research.* 2023;164. doi: 10.1016/j.jbusres.2023.113955.

- 532 41. Berman SL, Wicks A, Kotha S, Jones TM. Does Stakeholder Orientation Matter? The  
533 Relationship between Stakeholder Management Models and Firm Financial Performance.  
534 Academy of Management Journal. 1999;42(5):488-506. doi: 10.2307/256972.
- 535 42. Harrison J, Freeman RE, Cavalcanti Sá de Abreu M. Stakeholder Theory As an Ethical Approach  
536 to Effective Management: applying the theory to multiple contexts. Review of Business  
537 Management. 2015:858-69. doi: 10.7819/rbgn.v17i55.2647.
- 538 43. Hörisch J, Freeman RE, Schaltegger S. Applying Stakeholder Theory in Sustainability  
539 Management. Organization & Environment. 2014;27(4):328-46. doi: 10.1177/1086026614535786.
- 540 44. Ahmed U, Abdul Majid AH, Al-Aali La, Mozammel S. Can meaningful work really moderate the  
541 relationship between supervisor support, coworker support and work Engagement? Management  
542 Science Letters. 2019:229-42. doi: 10.5267/j.msl.2018.11.016.
- 543 45. Davis M, Coan P. Organizational Change. In The Psychology of Green Organizations. In: Barling  
544 J, Robertson JL, editors. The Psychology of Green Organizations. Oxford: Oxford University  
545 Press; 2015. pp. 244–274.
- 546 46. Boiral O, Paillé P. Organizational Citizenship Behaviour for the Environment: Measurement and  
547 Validation. Journal of Business Ethics. 2011;109(4):431-45. doi: 10.1007/s10551-011-1138-9.
- 548 47. Samaddar S, Ayaribilla AJ, Oteng-Ababio M, Dayour F, Yokomatsu M. Stakeholders' Perceptions  
549 on Effective Community Participation in Climate Change Adaptation. In: Sarkar A, Sensarma SR,  
550 vanLoon GW, editors. Sustainable Solutions for Food Security. Berlin: Springer Nature; 2019.
- 551 48. Graves LM, Sarkis J. The role of employees' leadership perceptions, values, and motivation in  
552 employees' provenvironmental behaviors. Journal of Cleaner Production. 2018;196:576-87. doi:  
553 10.1016/j.jclepro.2018.06.013.
- 554 49. Robertson JL, Carleton E. Uncovering How and When Environmental Leadership Affects  
555 Employees' Voluntary Pro-environmental Behavior. Journal of Leadership & Organizational  
556 Studies. 2017;25(2):197-210. doi: 10.1177/1548051817738940.
- 557 50. Gan CCR, Banwell N, Pascual RS, Chu C, Wang YW. Hospital climate actions and assessment  
558 tools: a scoping review protocol. BMJ Open. 2019;9(12):e032561. doi: 10.1136/bmjopen-2019-  
559 032561.

- 560 51. Jebb AT, Ng V, Tay L. A Review of Key Likert Scale Development Advances: 1995-2019. Front  
561 Psychology. 2021;12:637547. doi: 10.3389/fpsyg.2021.637547.
- 562 52. Kwak SK, Kim JH. Statistical data preparation: management of missing values and outliers.  
563 Korean Journal of Anesthesiology. 2017;70(4):407-11. doi: 10.4097/kjae.2017.70.4.407.
- 564 53. Shiker MAK. Multivariate Statistical Analysis. British Journal of Science. 2012;6(1):55-66.
- 565 54. Kaushik M, Mathur B. Comparative Study of K-Means and Hierarchical Clustering Techniques.  
566 International Journal of Software & Hardware Research in Engineering. 2014;2(6):93-8.
- 567 55. Strauss T, von Maltitz MJ. Generalising Ward's Method for Use with Manhattan Distances. PLoS  
568 One. 2017;12(1):e0168288. doi: 10.1371/journal.pone.0168288.
- 569 56. Backhaus K, Erichson B, Gensler S, Weiber R, Weiber T. Multivariate Analysis. An Application-  
570 Oriented Introduction. Wiesbaden: Springer Gabler; 2021.
- 571 57. Shi C, Wei B, Wei S, Wang W, Liu H, Liu J. A quantitative discriminant method of elbow point  
572 for the optimal number of clusters in clustering algorithm. EURASIP Journal on Wireless  
573 Communications and Networking. 2021;2021(1):1-16. doi: 10.1186/s13638-021-01910-w.
- 574 58. Sarti S, Darnall N, Testa F. Market segmentation of consumers based on their actual sustainability  
575 and health-related purchases. Journal of Cleaner Production. 2018;192:270-80. doi:  
576 10.1016/j.jclepro.2018.04.188.
- 577 59. Staniszewski J, Guth M, Smędzik-Ambroży K. Structural conditions of the sustainable  
578 intensification of agriculture in the regions of the European Union. Journal of Cleaner Production.  
579 2023;389. doi: 10.1016/j.jclepro.2023.136109.
- 580 60. Franke N, Reisinger H, Hoppe D. Remaining within-cluster heterogeneity: a meta-analysis of the  
581 "dark side" of clustering methods. Journal of Marketing Management. 2009;25(3-4):273-93. doi:  
582 10.1362/026725709x429755.
- 583 61. Baumgartner RJ. Managing Corporate Sustainability and CSR: A Conceptual Framework  
584 Combining Values, Strategies and Instruments Contributing to Sustainable Development.  
585 Corporate Social Responsibility and Environmental Management. 2013;21(5):258-71. doi:  
586 10.1002/csr.1336.

- 587 62. Kraus S, Rehman SU, García FJS. Corporate social responsibility and environmental performance:  
588 The mediating role of environmental strategy and green innovation. *Technological Forecasting*  
589 *and Social Change*. 2020;160. doi: 10.1016/j.techfore.2020.120262.
- 590 63. Novitasari M, Wijaya AL, Agustin NM, Gunardi A, Dana LP. Corporate social responsibility and  
591 firm performance: Green supply chain management as a mediating variable. *Corporate Social*  
592 *Responsibility and Environmental Management*. 2022;30(1):267-76. doi: 10.1002/csr.2353.
- 593 64. Vaishnavi V, Suresh M. Modelling the factors in implementation of environmental sustainability  
594 in healthcare organisations. *Management of Environmental Quality*. 2023;34(1):137-58. doi:  
595 10.1108/MEQ-10-2021-0243.
- 596 65. Seifert C, Guenther E. Who cares?—Stakeholder relevance for voluntary environmental  
597 management in hospitals. *Corporate Social Responsibility and Environmental Management*.  
598 2020;27(4):1786-99. doi: 10.1002/csr.1925.
- 599 66. Quitmann C, Sauerborn R, Danquah I, Herrmann A. Reducing the carbon footprint of a German  
600 university hospital: Perspectives from hospital stakeholders. *The Journal of Climate Change and*  
601 *Health*. 2023;12. doi: 10.1016/j.joclim.2023.100247.
- 602 67. Quitmann C, Sauerborn R, Danquah I, Herrmann A. 'Climate change mitigation is a hot topic, but  
603 not when it comes to hospitals': a qualitative study on hospital stakeholders' perception and sense  
604 of responsibility for greenhouse gas emissions. *Journal of Medical Ethics*. 2023;49(3):204-10. doi:  
605 10.1136/medethics-2021-107971.
- 606 68. Weisz U, Pichler P-P, Jaccard IS, Haas W, Matej S, Bachner F, et al. Carbon emission trends and  
607 sustainability options in Austrian health care. *Resources, Conservation and Recycling*. 2020;160.  
608 doi: 10.1016/j.resconrec.2020.104862.
- 609 69. Tomson C. Reducing the carbon footprint of hospital-based care. *Future Hospital Journal*.  
610 2015;2(1):57-62. doi: 10.7861/futurehosp.2-1-57.
- 611 70. Kallio H, Pietilä A-M, Johnson M, Kangasniemi M. Environmental responsibility in hospital care:  
612 Findings from a qualitative study. *Journal of Hospital Administration*. 2018;7(5):56-69. doi:  
613 10.5430/jha.v7n5p56.

- 614 71. Rhodes JH, Santos T, Young G. The Early Impact of the COVID-19 Pandemic on Hospital  
615 Finances. *Journal of Healthcare Management* 2023;68(1):38-55. doi: 10.1097/JHM-D-22-00037.
- 616 72. Federal Ministry for Economic Cooperation and Development. The German Act on Corporate Due  
617 Diligence in Supply Chains; 2023.
- 618 73. Ferraro F, Etzion D, Gehman J. Tackling Grand Challenges Pragmatically: Robust Action  
619 Revisited. *Organization Studies*. 2015;36(3):363-90. doi: 10.1177/0170840614563742.
- 620 74. Kolk A, Lenssen G, Pinkse J. Towards strategic stakeholder management? Integrating  
621 perspectives on sustainability challenges such as corporate responses to climate change. *Corporate*  
622 *Governance: The international journal of business in society*. 2007;7(4):370-8. doi:  
623 10.1108/14720700710820452.
- 624 75. Dögl C, Holtbrügge D. Corporate environmental responsibility, employer reputation and employee  
625 commitment: an empirical study in developed and emerging economies. *The International Journal*  
626 *of Human Resource Management*. 2014;25(12):1739-62. doi: 10.1080/09585192.2013.859164
- 627 76. Salas RN, Maibach E, Pencheon D, Watts N, Frumkin H. A pathway to net zero emissions for  
628 healthcare. *BMJ*. 2020;371:m3785. doi: 10.1136/bmj.m3785.
- 629 77. Antonacci G, Benevento E, Bonavitacola S, Cannavacciuolo L, Foglia E, Fusi G, et al. Healthcare  
630 professional and manager perceptions on drivers, benefits, and challenges of telemedicine: results  
631 from a cross-sectional survey in the Italian NHS. *BMC Health Services Research*.  
632 2023;23(1):1115. doi: 10.1186/s12913-023-10100-x.
- 633 78. Meterko M, Restuccia JD, Stolzmann K, Mohr D, Brennan C, Glasgow J, et al. Response Rates,  
634 Nonresponse Bias, and Data Quality. *Public Opinion Quarterly*. 2015;79(1):130-44. doi:  
635 10.1093/poq/nfu052.
- 636 79. Andrade C. The Limitations of Online Surveys. *Indian Journal of Psychological Medicine*.  
637 2020;42(6):575-6. doi: 10.1177/0253717620957496.
- 638 80. Singh S, Sagar R. A critical look at online survey or questionnaire-based research studies during  
639 COVID-19. *Asian J Psychiatr*. 2021;65:102850. doi: 10.1016/j.ajp.2021.102850.

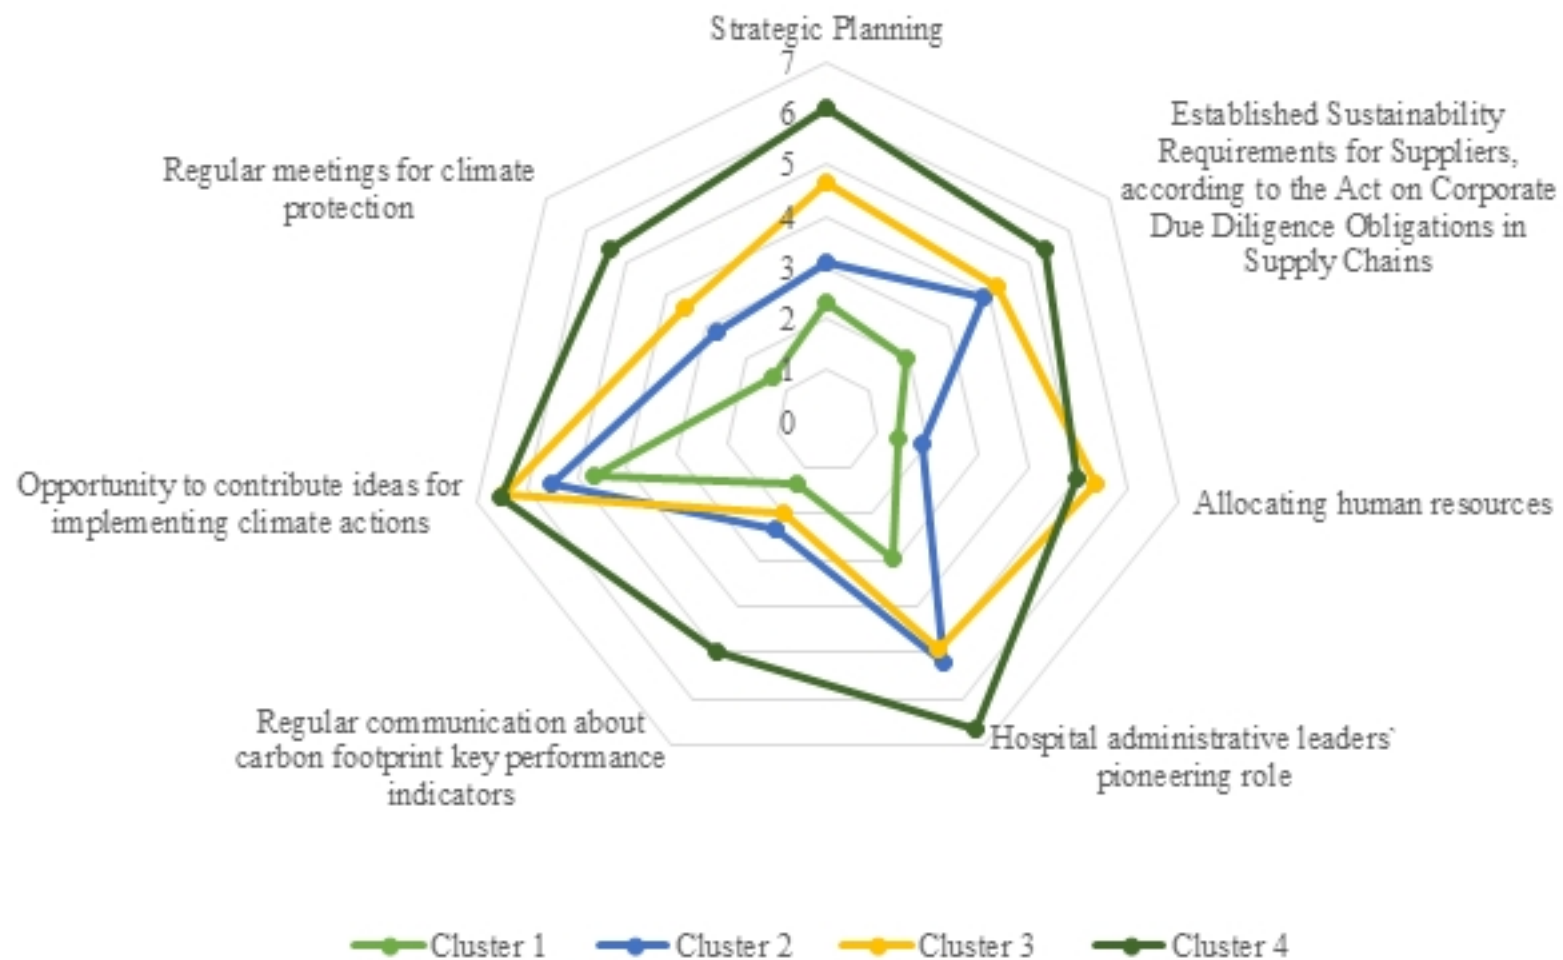

Figure
